# Supplementary material for: Nano zinc oxide activates MdCDF2 to promote DNA replication and cell proliferation in apple calli
Source: Royal Society of Chemistry journal article supplement (doi:10.1039/d4en00997e), 2024-12-27
Supplement: d4en00997e2.pdf [file d4en00997e2.pdf]

**Figure S1:** SEM of the ZnO BPs treated apple calli cells

**Table S1:** The primers utilized in the qRT-PCR analysis

**Table S2:** Alignment of the reference genome statistical tables

**Table S3:** All genes of CK and ZnO NPs treated groups and unique genes of each group

**Table S4:** Differentially expressed genes after ZnO NPs treatment

**Table S5:** TFs differentially expressed after ZnO NPs treatment

**Table S6:** Mass spectrometry analysis of the bound proteins
