# Supplementary figures and images for: Nano zinc oxide activates MdCDF2 to promote DNA replication and cell proliferation in apple calli
Source: Royal Society of Chemistry journal article supplement (doi:10.1039/d4en00997e), 2024-12-27

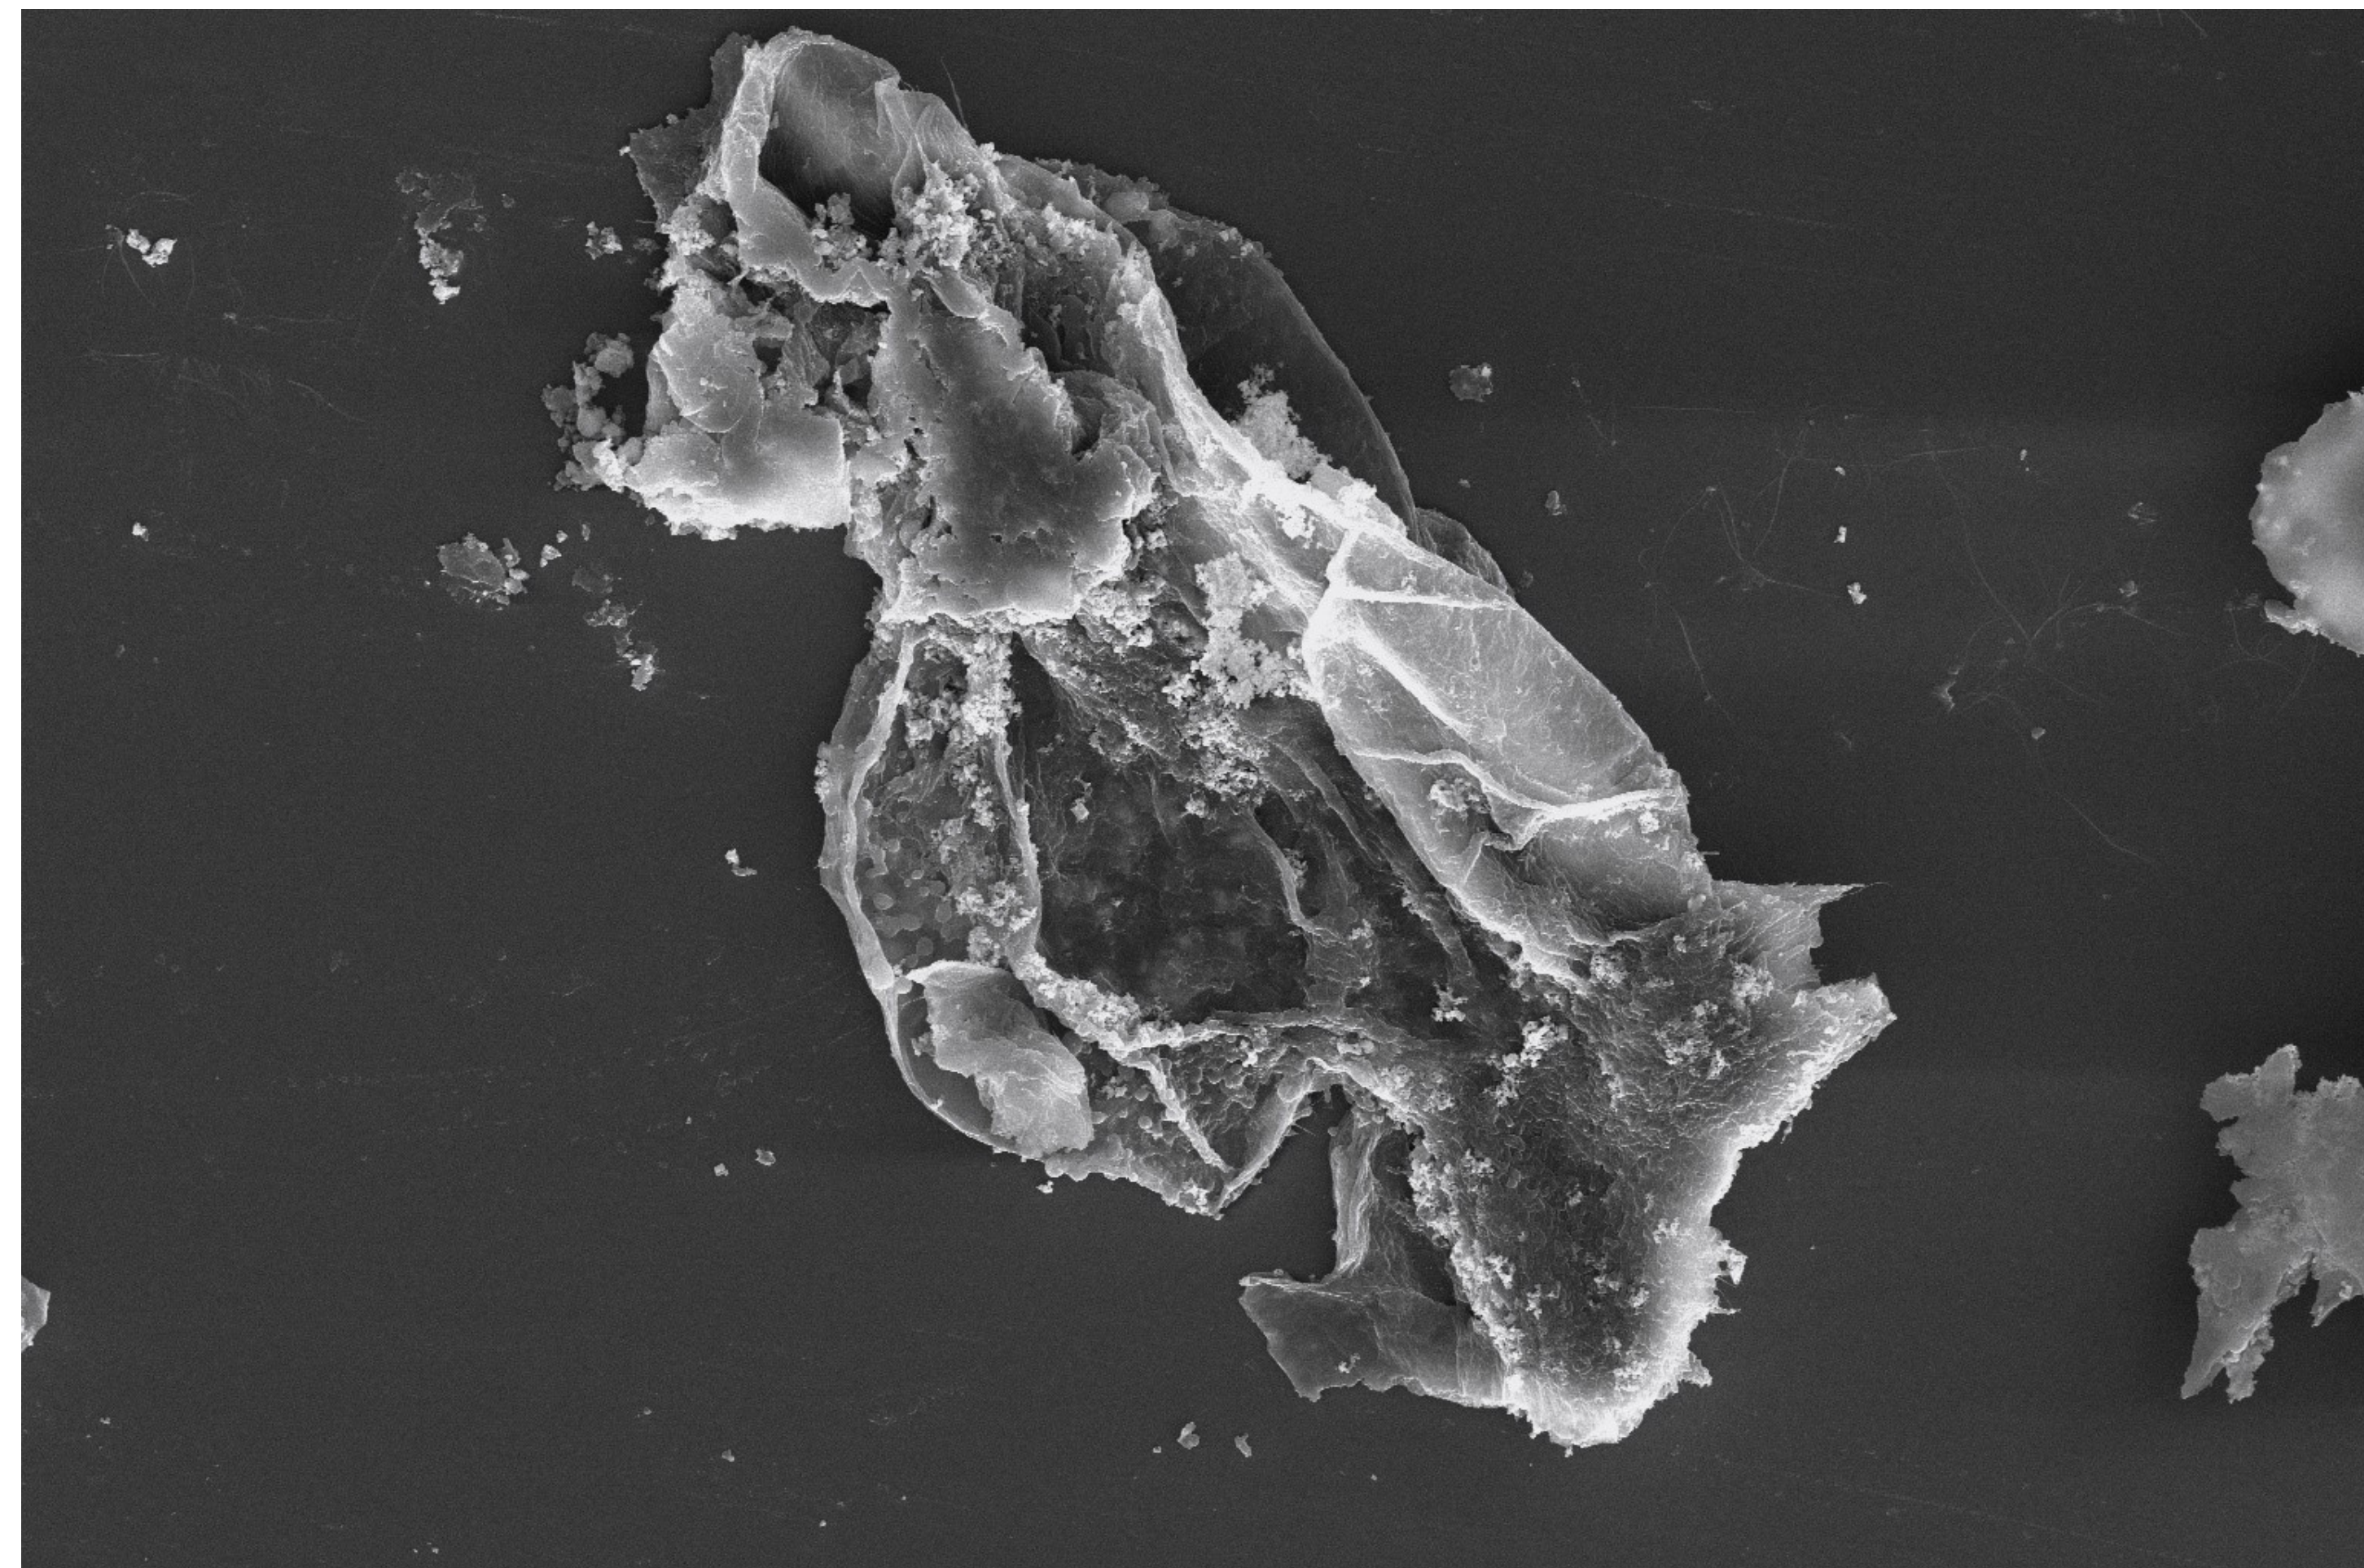

|                                                                                    |                |               |            |             |                  |               |                        |                        |                                                                                             |
|------------------------------------------------------------------------------------|----------------|---------------|------------|-------------|------------------|---------------|------------------------|------------------------|---------------------------------------------------------------------------------------------|
|  | HV<br>20.00 kV | WD<br>11.7 mm | det<br>ETD | spot<br>8.0 | mag □<br>2 000 x | HFW<br>207 μm | pressure<br>1.00E-3 Pa | 4/7/2023<br>9:42:50 AM |  50 μm |
|------------------------------------------------------------------------------------|----------------|---------------|------------|-------------|------------------|---------------|------------------------|------------------------|---------------------------------------------------------------------------------------------|

Supplement: d4en00997e3.pdf [file d4en00997e3.pdf]
